# Supplementary material for: Stoichiometry-dominated in situ formation of iodocuprate clusters and dimethyl-2,2′-biimidazoles as building units of coordination architectures
Source: Royal Society of Chemistry journal article supplement (doi:10.1039/c0ce00938e), 2011-01-01

# Supplementary Information

Fig. S1 The measured powder X-ray diffraction plots of **1** (upper) and **2** (lower)

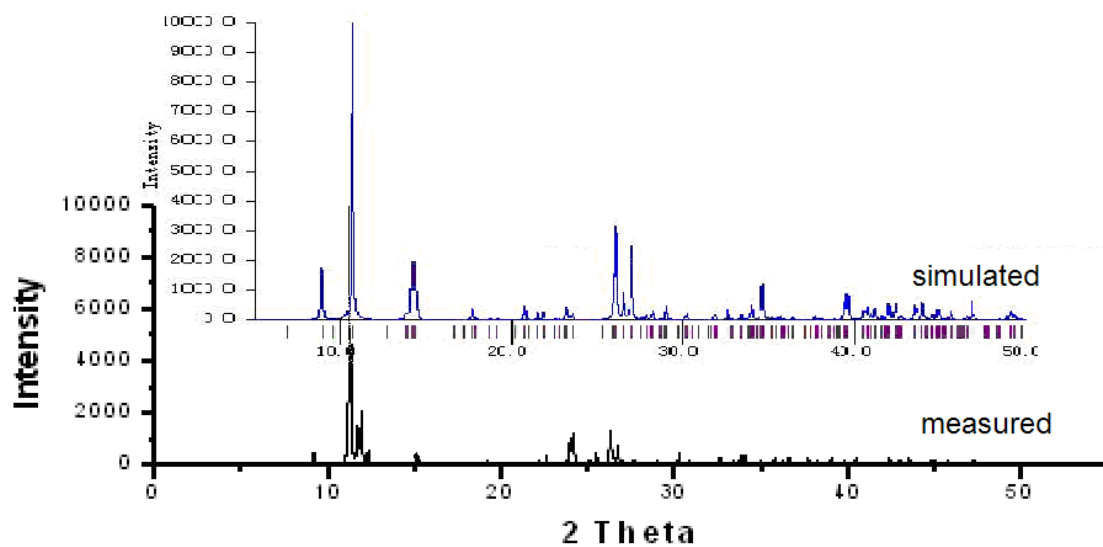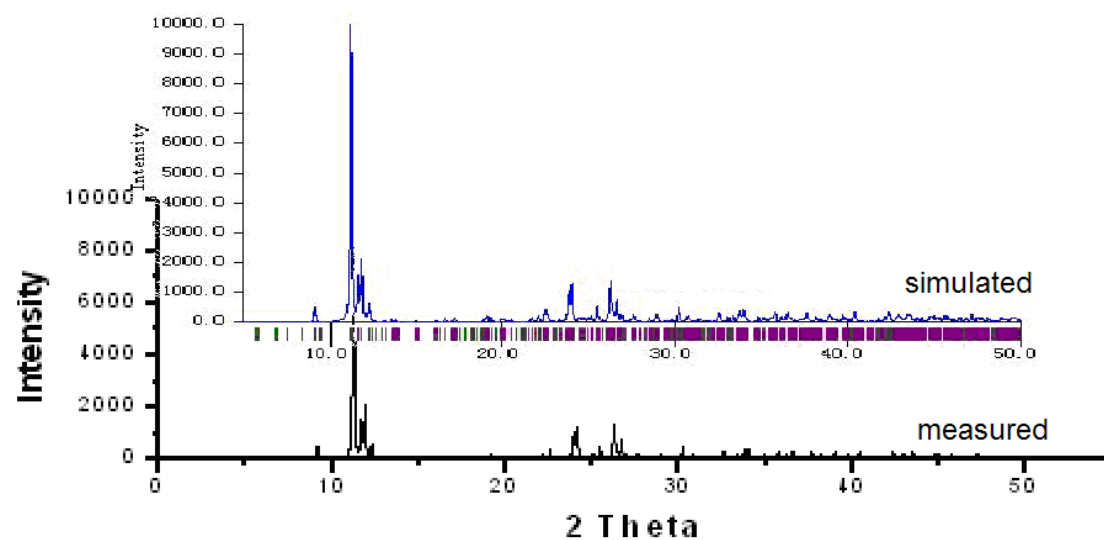

Fig. S2. The crystal packing pattern of **1**, viewed in *a-c* plan (upper) and along and *c* (lower)

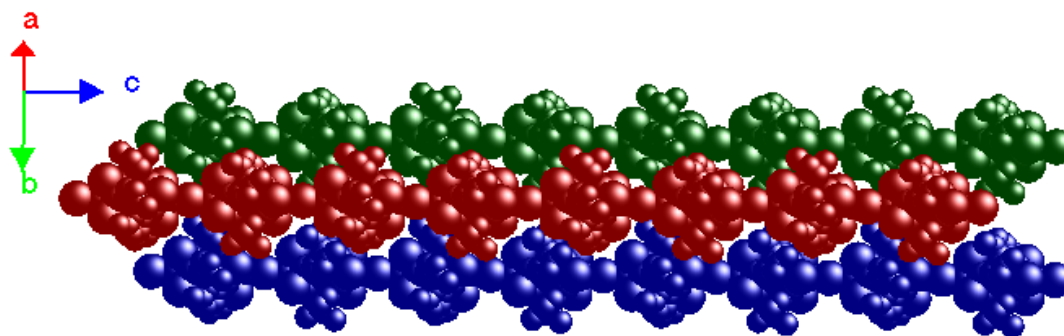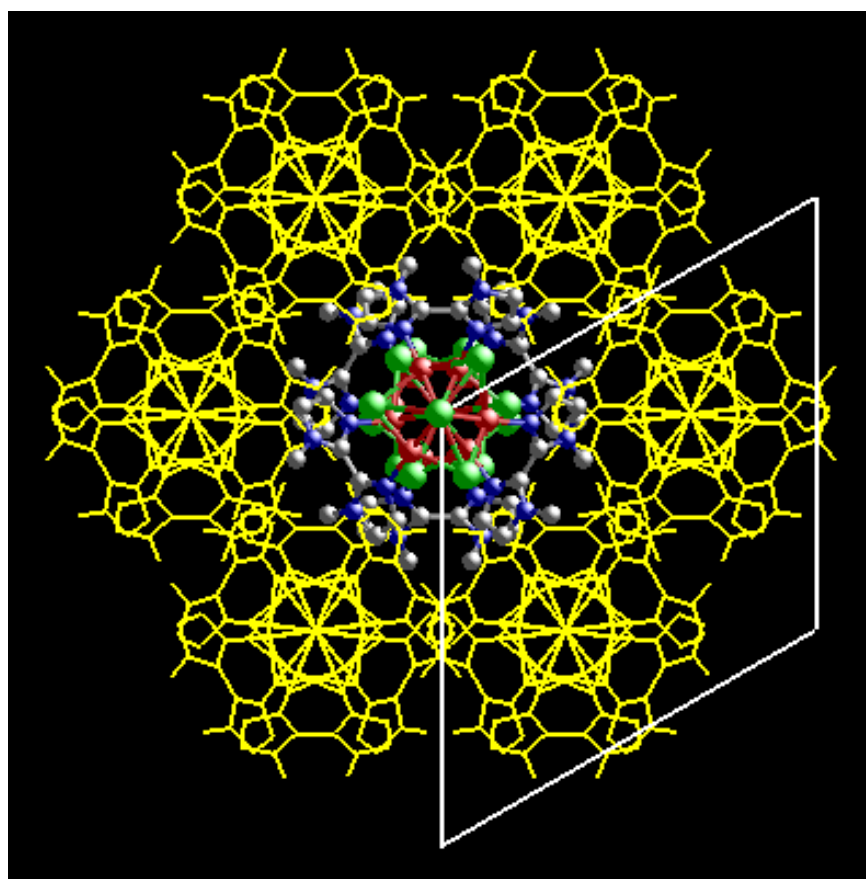

Fig. S3 The parallel  $\pi$ - $\pi$  interaction presenting among the entities of **1**

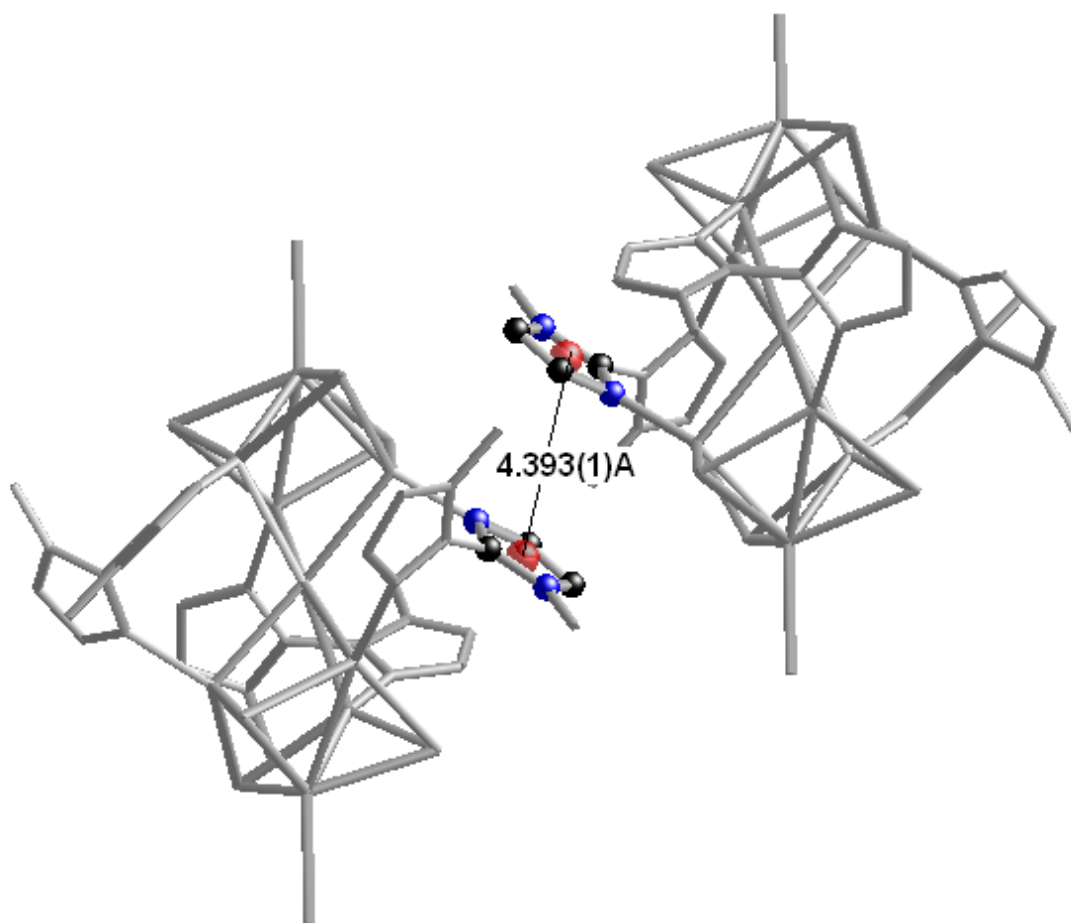

Fig. S4 The structures of 1,1'-DMBIM (left) and zwitterionic 1,3-DMBIM (right)

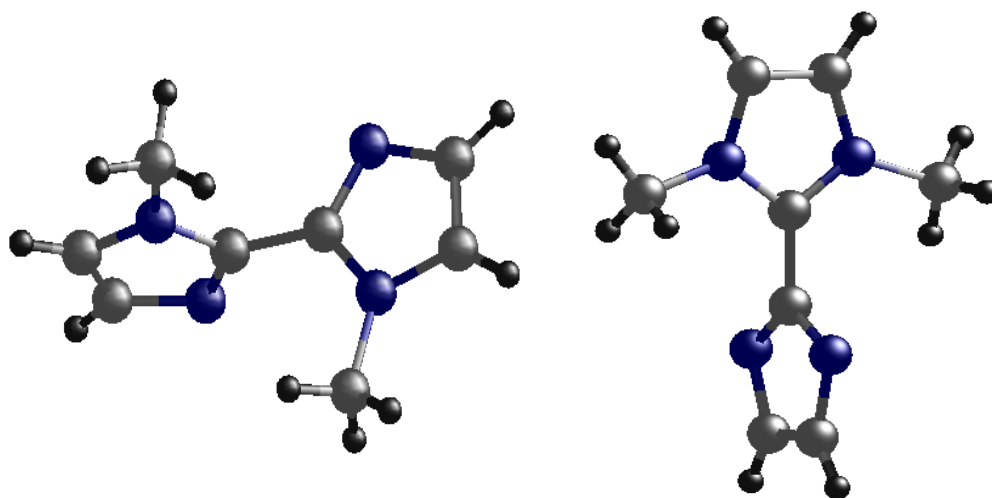

Fig. S5 The stoichiometry-discriminated assemblies of ICCs of **1** (left) and **2** (right)

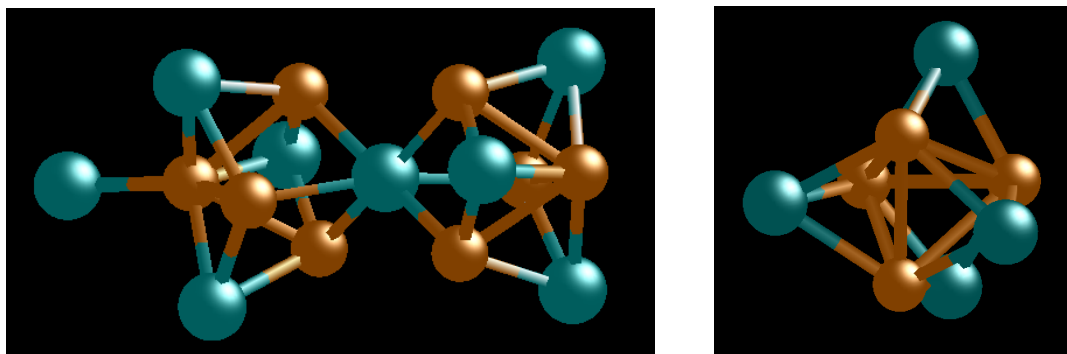

Fig. S6 The varied-temperature emission spectra of **1** (left) and **2** (right)

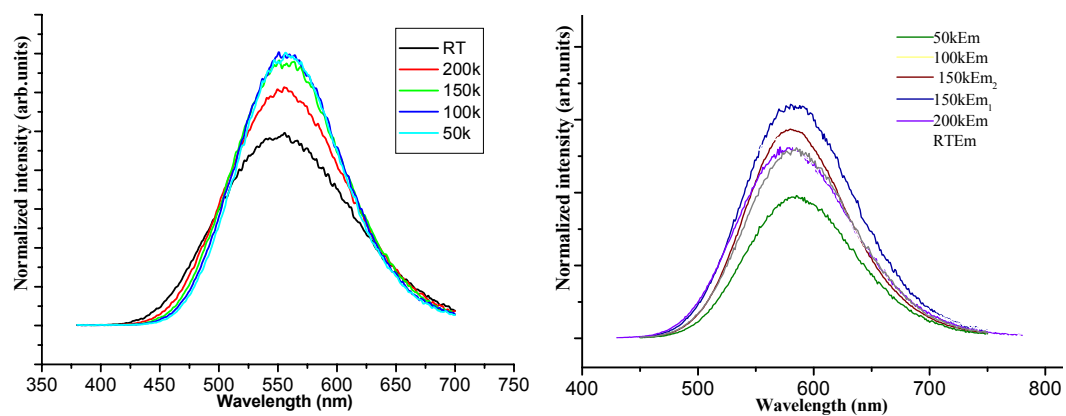

Supplement: c0ce00938e.pdf [file c0ce00938e.pdf]
